# Supplementary material for: An Updated Systematic Review of Childhood Physical Activity Questionnaires
Source: Springer Nature journal article supplement (doi:10.1007/s40279-018-0987-0), 2018-10-08
Supplement: MOESM2 [file 16182596]

## **Online resource 2 – Tables methodological quality scores**

An updated systematic review of childhood physical activity questionnaires

Journal: Sports Medicine

Lisan M. Hidding, Mai. J. M. Chinapaw, Mireille N. M. van Poppel, Lidwine B. Mokkink, Teatske M. Altenburg

Corresponding author:

Lisan Hidding

Amsterdam UMC, Vrije Universiteit Amsterdam, Department of Public and Occupational Health,

Amsterdam Public Health research institute, Van der Boechorststraat 7, NL-1081 BT

Amsterdam, The Netherlands

E-mail: [l.hidding@vumc.nl](mailto:l.hidding@vumc.nl)

Table 1 – Construct validity methodological quality scores

| Questionnaire                                                                             | Study population <sup>a</sup>                                  | Methodological quality <sup>b</sup> | Design requirement(s) that determined the final methodological quality score <sup>c</sup>                                                                                   |
|-------------------------------------------------------------------------------------------|----------------------------------------------------------------|-------------------------------------|-----------------------------------------------------------------------------------------------------------------------------------------------------------------------------|
| Preschool-age Children's Physical Activity Questionnaire (Pre-PAQ) (proxy) [58]           | n = 67<br>Age: 3- to 5-year olds<br>Sex: 48% girls             | Good                                | 1. Was the percentage of missing items given?<br>2. Was there a description of how missing items were handled?<br>3. Was the sample size included in the analysis adequate? |
| Modified Burdette proxy report (proxy) [59]                                               | n = 107<br>Age: 3.4±1.2 years<br>Sex: percentage girls unknown | Fair                                | 4. Were hypotheses regarding correlations or mean differences formulated a priori (i.e. before data collection)?                                                            |
| Modified Harro proxy report (proxy) [59]                                                  | n = 131<br>Age: 3.8±1.3<br>Sex: percentage girls unknown       | Fair                                | 4. Were hypotheses regarding correlations or mean differences formulated a priori (i.e. before data collection)?                                                            |
| Physical activity questionnaire for parents of preschoolers in Mexico [40]                | n = 35<br>Age: 4.4±0.7 years [3-5]<br>Sex: 51% girls           | Poor                                | 4. Were hypotheses regarding correlations or mean differences formulated a priori (i.e. before data collection)?                                                            |
| Children's Physical Activity Questionnaire (CPAQ) (proxy) [60] <sup>d</sup>               | n = 27<br>Age: 4.9±0.7 years [4-5]<br>Sex: 38% girls           | Poor (all comparison measures)      | 3. Was the sample size included in the analysis adequate?                                                                                                                   |
| Physical activity and sedentary behavior proxy questionnaire (based on CHMS) (proxy) [61] | n = 87<br>Age: 4-70 months<br>Sex: 54% girls                   | Poor                                | 4. Were hypotheses regarding correlations or mean differences formulated a priori (i.e. before data collection)?                                                            |
| Out-of-school Physical Activity questionnaire [62]                                        | n = 126<br>Age: 11-year-olds                                   | Fair                                | 4. Were hypotheses regarding correlations or mean differences                                                                                                               |

|                                                                                         |                                                                                                             |                                |                                                                                                                                                                                                                                             |
|-----------------------------------------------------------------------------------------|-------------------------------------------------------------------------------------------------------------|--------------------------------|---------------------------------------------------------------------------------------------------------------------------------------------------------------------------------------------------------------------------------------------|
|                                                                                         | Sex: 60% girls (in total sample n=155)                                                                      |                                | formulated a priori (i.e. before data collection)?                                                                                                                                                                                          |
| Children's Leisure Activities Study Survey Chinese-version questionnaire (CLASS-C) [50] | n=139; [9-12yrs]; 65% girls                                                                                 | Fair                           | 4.Were hypotheses regarding correlations or mean differences formulated a priori (i.e. before data collection)?                                                                                                                             |
| Physical Activity Questionnaire for Older Children (PAQ-C) [27] <sup>d</sup>            | n = ranging from 73 (Caltrac) to 97 (activity rating and Godin 1)<br>Age: 11.3±1.4 years [9-14]<br>Sex: 58% | Fair (all comparison measures) | 2.Was there a description of how missing items were handled?                                                                                                                                                                                |
| Previous Day Physical Activity Recall (PDPAR) [30]                                      | n = 37<br>Age: 10.8±0.1 years (in total sample n=38)<br>Sex: 51% girls                                      | Fair                           | 3.Was the sample size included in the analysis adequate?<br>4.Were hypotheses regarding correlations or mean differences formulated a priori (i.e. before data collection)?                                                                 |
| Physical Activity Questionnaire for older Children (PAQ-C) (Spanish version) [52]       | n = 78<br>Age: 11.0 ± 1.2 (total sample n=83)<br>Sex: 45 % girls (total sample n=83)                        | Fair                           | 4.Were hypotheses regarding correlations or mean differences formulated a priori (i.e. before data collection)?                                                                                                                             |
| Godin Leisure-Time Exercise Questionnaire [63]                                          | n = 31<br>Age: 10.6 ± 0.2<br>Sex: 45 % girls                                                                | Fair                           | 2.Was there a description of how missing items were handled?<br>3.Was the sample size included in the analysis adequate?<br>4.Were hypotheses regarding correlations or mean differences formulated a priori (i.e. before data collection)? |

|                                                                                                                                 |                                                                                           |      |                                                                                                                                                                                    |
|---------------------------------------------------------------------------------------------------------------------------------|-------------------------------------------------------------------------------------------|------|------------------------------------------------------------------------------------------------------------------------------------------------------------------------------------|
| Multimedia Activity Recall for Children and Adolescents (MARCA) [64] <sup>d</sup>                                               | n = 66<br>Age: 11.6±0.8 years<br>Sex: 50% girls                                           | Fair | 4. Were hypotheses regarding correlations or mean differences formulated a priori (i.e. before data collection)?                                                                   |
| Chinese version of the Physical Activity Questionnaire for Older Children (PAQ-C) [43]                                          | n = 358<br>Age: 10.5±1.1 years [8-13] (in total sample n=742)<br>Sex: 46% girls           | Fair | 4. Were hypotheses regarding correlations or mean differences formulated a priori (i.e. before data collection)?                                                                   |
| Youth Activity Profile (YAP) [38]                                                                                               | n = 291<br>Age: 9.7±1.0 (n=135), 11.7±0.8 (n=67), 15.7±1.2 (n=89) years<br>Sex: 56% girls | Fair | 9. Were there any important flaws in the design or methods of the study?                                                                                                           |
| Food, Health, and Choices questionnaire (FHC-Q) [37]                                                                            | n = 66<br>Age: <9- to >12-year olds<br>Sex: 50 % girls                                    | Fair | 2. Was there a description of how missing items were handled?<br>8. For convergent validity: Were the measurement properties of the comparator instrument(s) adequately described? |
| Self-administered questionnaire to assess physical activity and sedentary behaviors [65]                                        | n = 86<br>Age: 10.2 ± 1.1<br>Sex: 54 % girls                                              | Poor | 8. For convergent validity: Were the measurement properties of the comparator instrument(s) adequately described?                                                                  |
| The South American Youth/Child Cardiovascular and Environment Study (SAYCARE) Physical Activity (PA) questionnaire (proxy) [66] | n = 82<br>Age: 3- to 10-year olds<br>Sex: 54 % girls                                      | Poor | 8. For convergent validity: Were the measurement properties of the comparator instrument(s) adequately described?                                                                  |

|                                                                                                  |                                                                                    |                                |                                                                                                                  |
|--------------------------------------------------------------------------------------------------|------------------------------------------------------------------------------------|--------------------------------|------------------------------------------------------------------------------------------------------------------|
| Canadian Health Measures Survey (CHMS) [67]                                                      | n = 878<br>Age: 8.7 years (95% CI 8.5-8.9) [6-11]<br>Sex: 49% girls                | Poor                           | 4.Were hypotheses regarding correlations or mean differences formulated a priori (i.e. before data collection)?  |
| Many Rivers Physical Activity Recall Questionnaire (MRPARQ) (modified version of the APARQ) [68] | n = 86<br>Age: 11.1±0.7 years<br>Sex: 59% girls                                    | Poor                           | 4.Were hypotheses regarding correlations or mean differences formulated a priori (i.e. before data collection)?  |
| Patient Assessment and Council for Exercise (PACE) [69]                                          | n = 18<br>Age: 11.9±2.0 years<br>Sex: 59% girls<br>(age and sex total sample n=22) | Poor (all comparison measures) | 3.Was the sample size included in the analysis adequate?                                                         |
| Self-Administered Physical Activity Checklist (SAPAC) (Greek version) [49]                       | n = 90<br>Age: 11.4±0.6 (boys)<br>11.3±0.6 (girls) years<br>Sex: 57% girls         | Poor                           | 8.For convergent validity: Were the measurement properties of the comparator instrument(s) adequately described? |
| Assessment of Young Children's Activity using Video Technology (ACTIVITY) [70] <sup>d</sup>      | n = 47<br>Age: 7.7±0.5 years<br>Sex: 40% girls                                     | Poor (all comparison measures) | 4.Were hypotheses regarding correlations or mean differences formulated a priori (i.e. before data collection)?  |
| Synchronised Nutrition and Activity Program (SNAP) [71] <sup>d</sup>                             | n = 121<br>Age: 10.7±2.2 years [7-15]<br>Sex: 60% girls                            | Poor                           | 4.Were hypotheses regarding correlations or mean differences formulated a priori (i.e. before data collection)?  |
| PA questionnaire for parents and teachers [72] <sup>d</sup>                                      | n = 62<br>Age: 7.0±0.7 years [4-8]<br>Sex: 52% girls                               | Poor (all comparison measures) | 4.Were hypotheses regarding correlations or mean differences formulated a priori (i.e. before data collection)?  |

|                                                                                |                                                                                                                                                              |                                |                                                                                                                                                                                                                                       |
|--------------------------------------------------------------------------------|--------------------------------------------------------------------------------------------------------------------------------------------------------------|--------------------------------|---------------------------------------------------------------------------------------------------------------------------------------------------------------------------------------------------------------------------------------|
| Physical Activity Questionnaire for older Children (PAQ-C) [51]                | n = 58<br>Age: 7- to 9-year olds<br>Sex: 48 % girls                                                                                                          | Poor                           | 9. Were there any important flaws in the design or methods of the study?                                                                                                                                                              |
| The Modified Godin Leisure-Time Exercise Questionnaire [45]                    | n = 139<br>Age: 11.1 ± 0.4<br>Sex: 52 % girls                                                                                                                | Poor                           | 4. Were hypotheses regarding correlations or mean differences formulated a priori (i.e. before data collection)?                                                                                                                      |
| Parent proxy-report of physical activity and sedentary activities (proxy) [73] | n = 167 (validity vs. accelerometer), n = 125 (validity vs. diary)<br>Age: 6- to 10-year olds, 13- to 14-year olds<br>Sex: 51% girls (in total sample n=189) | Poor (all comparison measures) | 4. Were hypotheses regarding correlations or mean differences formulated a priori (i.e. before data collection)?<br>8. For convergent validity: Were the measurement properties of the comparator instrument(s) adequately described? |
| Diet and lifestyle questionnaire [74]                                          | N = 446<br>Age: 9.0-11.9 years (in total sample n=563)<br>Sex: 53% girls (in total sample n=563)                                                             | Poor                           | 4. Were hypotheses regarding correlations or mean differences formulated a priori (i.e. before data collection)?<br>8. For convergent validity: Were the measurement properties of the comparator instrument(s) adequately described? |
| ATN-Questionnaire [75]                                                         | n = 58<br>Age: 11.4±0.5 years<br>Sex: 54% girls                                                                                                              | Poor (all comparison measures) | 4. Were hypotheses regarding correlations or mean differences formulated a priori (i.e. before data collection)?<br>8. For convergent validity: Were the measurement properties of the comparator instrument(s) adequately described? |

|                                                                                       |                                                                                                                                   |                                |                                                                                                                                                                                                                                     |
|---------------------------------------------------------------------------------------|-----------------------------------------------------------------------------------------------------------------------------------|--------------------------------|-------------------------------------------------------------------------------------------------------------------------------------------------------------------------------------------------------------------------------------|
| the ENERGY-child questionnaire [48]                                                   | n = 96<br>Age: [11.4±0.6 - 12.0±0.6 years]<br>Sex: [31% - 67% girls]                                                              | Poor                           | 4.Were hypotheses regarding correlations or mean differences formulated a priori (i.e. before data collection)?                                                                                                                     |
| A physical activity questionnaire [76]                                                | n = 4254<br>Age: 11.3 years<br>Sex: 51% girls (in total sample n=4452)                                                            | Poor                           | 4.Were hypotheses regarding correlations or mean differences formulated a priori (i.e. before data collection)?<br>8.For convergent validity: Were the measurement properties of the comparator instrument(s) adequately described? |
| Instrument to assess children's outdoor active play in various locations (proxy) [77] | n = 46<br>Age: 9.2 years [7.9-11.7] Sex: 50% girls                                                                                | Poor                           | 8.For convergent validity: Were the measurement properties of the comparator instrument(s) adequately described?                                                                                                                    |
| Questions from the National Longitudinal Survey of Children and Youth [78]            | n = 3,940 (organized sports question)<br>n = 3,958 (leisure sports question)<br>Age: 5th graders<br>Sex: percentage girls unknown | Poor                           | 4.Were hypotheses regarding correlations or mean differences formulated a priori (i.e. before data collection)?<br>8.For convergent validity: Were the measurement properties of the comparator instrument(s) adequately described? |
| Physical Activity Questionnaire for Older Children (PAQ-C) (minor modifications) [44] | n = 132<br>Age: 10.3±0.6 years [9-11]<br>Sex: 48% girls                                                                           | Poor                           | 8.For convergent validity: Were the measurement properties of the comparator instrument(s) adequately described?                                                                                                                    |
| A physical activity questionnaire of the Estonian Children Personality Behavior and   | n = 224<br>Age 12.2±0.8 years<br>Sex: 0% girls                                                                                    | Good (all comparison measures) | 4.Were hypotheses regarding correlations or mean differences formulated a priori (i.e. before data collection)?                                                                                                                     |

|                                                                                                                        |                                                                                 |                                |                                                                                                                                                                                                                                                                                                     |
|------------------------------------------------------------------------------------------------------------------------|---------------------------------------------------------------------------------|--------------------------------|-----------------------------------------------------------------------------------------------------------------------------------------------------------------------------------------------------------------------------------------------------------------------------------------------------|
| Health Study (ECPBHS)<br>[79]                                                                                          |                                                                                 |                                |                                                                                                                                                                                                                                                                                                     |
| A physical activity questionnaire of the Estonian Children Personality Behavior and Health Study (ECPBHS) (proxy) [79] | n = 224<br>Age 12.2±0.8 years<br>Sex: 0% girls                                  | Good (all comparison measures) | 4.Were hypotheses regarding correlations or mean differences formulated a priori (i.e. before data collection)?                                                                                                                                                                                     |
| 3-Day Physical Activity Record (3DPARrecord) (Greek version) [33]                                                      | n = 33<br>Age: 13.7±0.8 years<br>Sex: 43% girls (age and sex total sample n=40) | Fair                           | 3.Was the sample size included in the analysis adequate?<br>4.Were hypotheses regarding correlations or mean differences formulated a priori (i.e. before data collection)?                                                                                                                         |
| Seven Day Physical Activity Recall (7 Day-PAR) (Spanish version) [80]                                                  | n = 123<br>Age: 14.9 ± 0.9 [13-17]<br>Sex: 59 % girls                           | Fair (all comparison measures) | 2.Was there a description of how missing items were handled?<br>4.Were hypotheses regarding correlations or mean differences formulated a priori (i.e. before data collection)?<br>8.For convergent validity: Were the measurement properties of the comparator instrument(s) adequately described? |
| Youth Physical Activity Questionnaire (YPAQ) [81]                                                                      | n = 44<br>Age: 12.7 [12- 13]<br>Sex: 61 % girls                                 | Fair                           | 3.Was the sample size included in the analysis adequate?<br>4.Were hypotheses regarding correlations or mean differences formulated a priori (i.e. before data collection)?                                                                                                                         |
| International Physical Activity Questionnaire –                                                                        | n = 191<br>Age: 14.0 ± 0.7<br>Sex: 0 % girls                                    | Fair                           | 4.Were hypotheses regarding correlations or mean differences                                                                                                                                                                                                                                        |



|                                                                                             |                                                                                   |      |                                                                                                                                                                                                                                     |
|---------------------------------------------------------------------------------------------|-----------------------------------------------------------------------------------|------|-------------------------------------------------------------------------------------------------------------------------------------------------------------------------------------------------------------------------------------|
| Short Form (IPAQ-SF)<br>[82]                                                                |                                                                                   |      | formulated a priori (i.e. before data collection)?                                                                                                                                                                                  |
| Tartu Physical Activity Questionnaire (TPAQ)<br>[82]                                        | n = 191<br>Age: 14.0 ± 0.7<br>Sex: 0 % girls                                      | Fair | 4.Were hypotheses regarding correlations or mean differences formulated a priori (i.e. before data collection)?                                                                                                                     |
| Physical Activity and Lifestyle Questionnaire (PALQ) (Greek version)<br>[33]                | n = 33<br>Age: 13.7±0.8 years<br>Sex: 43% girls (age and sex total sample n=40)   | Fair | 3.Was the sample size included in the analysis adequate?<br>4.Were hypotheses regarding correlations or mean differences formulated a priori (i.e. before data collection)?                                                         |
| Moderate and vigorous physical activity items of the Youth Risk Behavior Survey (YRBS) [83] | n = 125<br>Age: 12.2±0.6 years<br>Sex: 53% girls (age and sex total sample n=139) | Fair | 4.Were hypotheses regarding correlations or mean differences formulated a priori (i.e. before data collection)?                                                                                                                     |
| 3-Day Physical Activity Recall (3DPARrecall) instrument [20]                                | n = 70<br>Age: 14.0±0.9 years [13-16]<br>Sex: 100% girls                          | Fair | 4.Were hypotheses regarding correlations or mean differences formulated a priori (i.e. before data collection)?                                                                                                                     |
| International Physical Activity Questionnaire - Short Form (IPAQ - SF)<br>[84]              | n = 1021<br>Age: 14.3±1.6 years [12-18]<br>Sex: 47% girls                         | Fair | 4.Were hypotheses regarding correlations or mean differences formulated a priori (i.e. before data collection)?<br>8.For convergent validity: Were the measurement properties of the comparator instrument(s) adequately described? |
| PACE+ questionnaire [85]                                                                    | n = 235<br>Age: 14.7±3.1 years<br>Sex: 59% girls                                  | Fair | 4.Were hypotheses regarding correlations or mean differences                                                                                                                                                                        |

|                                                                                    |                                                                                                                                                                                                                                                                             |      |                                                                                                                  |
|------------------------------------------------------------------------------------|-----------------------------------------------------------------------------------------------------------------------------------------------------------------------------------------------------------------------------------------------------------------------------|------|------------------------------------------------------------------------------------------------------------------|
|                                                                                    |                                                                                                                                                                                                                                                                             |      | formulated a priori (i.e. before data collection)?                                                               |
| 3-Day Physical Activity Recall (3DPAR recall) (modified for Australian youth) [86] | n = 155<br>Age: 12.3±0.9 years<br>Sex: 50% girls                                                                                                                                                                                                                            | Fair | 4. Were hypotheses regarding correlations or mean differences formulated a priori (i.e. before data collection)? |
| Single-item activity measure [23]                                                  | n = 96<br>(Accelerometer wear time 480 min./d.)<br>Age: 14.7±0.5 years<br>Sex: 38% girls (total sample (age and sex total sample n=123))<br><br>n = 72<br>(Accelerometer > wear time 600 min./d.)<br>Age: 14.7±0.5 years<br>Sex: 38% girls (age and sex total sample n=123) | Fair | 4. Were hypotheses regarding correlations or mean differences formulated a priori (i.e. before data collection)? |
| Oxford Physical Activity Questionnaire (OPAQ) [23]                                 | n = 96<br>(Accelerometer wear time 480 mins/day)<br>Age: 14.7±0.5 years<br>Sex: 38% girls (total sample (age and sex total sample n=123))<br><br>n = 72<br>(Accelerometer >                                                                                                 | Fair | 4. Were hypotheses regarding correlations or mean differences formulated a priori (i.e. before data collection)? |

|                                                                           |                                                                                                                                                                                   |                                |                                                                                                                 |
|---------------------------------------------------------------------------|-----------------------------------------------------------------------------------------------------------------------------------------------------------------------------------|--------------------------------|-----------------------------------------------------------------------------------------------------------------|
|                                                                           | wear time 600 min/day)<br>Age: 14.7±0.5 years<br>Sex: 38% girls (age and sex total sample n=123)                                                                                  |                                |                                                                                                                 |
| MVPA self-report questionnaire [87]                                       | n = 203 (5 valid accelerometer days)<br>Age: 15.8±0.7 years<br>Sex: 61% girls<br><br>n = 103 (7 valid accelerometer days)<br>Age: 15.8±0.7 (total sample n=203)<br>Sex: 67% girls | Fair                           | 4.Were hypotheses regarding correlations or mean differences formulated a priori (i.e. before data collection)? |
| Activity Questionnaire for Adults and Adolescents (AQuAA) [21]            | n = 42<br>Age: 13.4±1.0 years<br>Sex: 50% girls                                                                                                                                   | Fair                           | 3.Was the sample size included in the analysis adequate?                                                        |
| Physical Activity Questionnaire for Adolescents (PAQ-A) [88] <sup>d</sup> | n = ranging from 48 (Caltrac) to 85 (Activity rating, Godin 1 and 2)<br>Age: 16.3±1.5 years<br>Sex: 52% girls                                                                     | Fair (all comparison measures) | 4.Were hypotheses regarding correlations or mean differences formulated a priori (i.e. before data collection)? |
| Modified Physical Activity Questionnaire for Adolescents (PAQ-A) [34]     | n = 88<br>Age: 14.5±1.7 years<br>Sex: 42% girls (age and sex total sample n=169)                                                                                                  | Fair (all comparison measures) | 4.Were hypotheses regarding correlations or mean differences formulated a priori (i.e. before data collection)? |
| An adapted version of the Assessment of Physical Activity Levels          | n = 77<br>Age: 13.6 ± 1.1<br>Sex: 35 % girls                                                                                                                                      | Fair                           | 4.Were hypotheses regarding correlations or mean differences                                                    |

|                                                                                     |                                                                                                                                                                                                                                    |                                                   |                                                                                                                                                                                                   |
|-------------------------------------------------------------------------------------|------------------------------------------------------------------------------------------------------------------------------------------------------------------------------------------------------------------------------------|---------------------------------------------------|---------------------------------------------------------------------------------------------------------------------------------------------------------------------------------------------------|
| Questionnaire (APALQ)<br>[53]                                                       |                                                                                                                                                                                                                                    |                                                   | formulated a priori (i.e. before data collection)?                                                                                                                                                |
| 3-Day Physical Activity Recall (3DPAR recall) instrument (Singaporean version) [42] | n = 219<br>Age: 14.5±1.1 years [13-16]<br>Sex: 53% girls (age and sex total sample n=221)                                                                                                                                          | Fair                                              | 4.Were hypotheses regarding correlations or mean differences formulated a priori (i.e. before data collection)?<br>9. Were there any important flaws in the design or methods of the study?       |
| Web-based physical Activity Questionnaire for Older Children (PAQ-C) [28]           | n = 342 (pedometer), 391 (shuttlerun)<br>Age: 12.8 years<br>Sex: 51 % girls (age and sex total sample n=459)                                                                                                                       | Fair (all comparison measures)                    | 4.Were hypotheses regarding correlations or mean differences formulated a priori (i.e. before data collection)?                                                                                   |
| Physical activity questionnaire of the Arab Teen Lifestyle Study [89]               | n = 75<br>Age: 16.1±1.1<br>Sex: 48% girls                                                                                                                                                                                          | Fair                                              | 4.Were hypotheses regarding correlations or mean differences formulated a priori (i.e. before data collection)?                                                                                   |
| Previous Day Physical Activity Recall (PDPAR) [31]                                  | ACTIVITYGRAM<br>n = 147<br>Age:12.4±0.4 years<br>Sex: 44% girls<br>Biotrainer (first sample)<br>n = 28 [25-28]<br>Age: 12.4±0.5 years<br>Sex: 50% girls<br><br>Biotrainer (second sample) n = 128<br>Age: unknown<br>Sex:36% girls | Poor vs. biotrainer<br><br>Fair vs. questionnaire | Poor:<br>3.Was the sample size included in the analysis adequate?<br><br>Fair:<br>4.Were hypotheses regarding correlations or mean differences formulated a priori (i.e. before data collection)? |

|                                                                                            |                                                                                                                                                       |                                                      |                                                                                                                                                                                                     |
|--------------------------------------------------------------------------------------------|-------------------------------------------------------------------------------------------------------------------------------------------------------|------------------------------------------------------|-----------------------------------------------------------------------------------------------------------------------------------------------------------------------------------------------------|
| ACTIVITYGRAM self-report assessment [31]                                                   | PDPAR<br>n = 147<br>Age: 12.4±0.4 years<br>Sex: 44% girls<br><br>Biotrainer<br>n = 28 [25-28]<br>Age: 12.4±0.5 years<br>Sex: 50% girls                | Poor vs. biotrainer<br><br>Fair vs. questionnaire    | Poor:<br>3. Was the sample size included in the analysis adequate?<br><br>Fair:<br>4. Were hypotheses regarding correlations or mean differences formulated a priori (i.e. before data collection)? |
| MVPA scores of the International Physical Activity Questionnaire Short form (IPAQ-SF) [90] | n = 76 (vs. acc.)<br>Age: 12.7 ± 1.4 (total sample n=998)<br>Sex: 53 % girls<br><br>n = 998 (vs. questionnaire)<br>Age: 12.7 ± 1.4<br>Sex: 50 % girls | Fair vs. accelerometer<br><br>Poor vs. questionnaire | 4. Were hypotheses regarding correlations or mean differences formulated a priori (i.e. before data collection)?                                                                                    |
| MVPA scores of the Health Behavior in School-aged Children (HBSC) Research Protocol [90]   | n = 76 (vs. acc.)<br>Age: 12.7 ± 1.4 (total sample n=998)<br>Sex: 53 % girls<br><br>n = 998 (vs. questionnaire)<br>Age: 12.7 ± 1.4<br>Sex: 50 % girls | Fair vs. accelerometer<br><br>Poor vs. questionnaire | 4. Were hypotheses regarding correlations or mean differences formulated a priori (i.e. before data collection)?                                                                                    |
| The South American Youth/Child Cardiovascular and Environment Study (SAYCARE) Physical     | n = 60<br>Age: 11- to 18-year olds<br>Sex: 56 % girls                                                                                                 | Poor                                                 | 8. For convergent validity: Were the measurement properties of the comparator instrument(s) adequately described?                                                                                   |

|                                                                                                  |                                                                                                                                                                                                   |                                |                                                                                                                   |
|--------------------------------------------------------------------------------------------------|---------------------------------------------------------------------------------------------------------------------------------------------------------------------------------------------------|--------------------------------|-------------------------------------------------------------------------------------------------------------------|
| Activity (PA) questionnaire [66]                                                                 |                                                                                                                                                                                                   |                                |                                                                                                                   |
| Pelotas Birth cohort physical activity questionnaire [91]                                        | n = 25<br>Age: 13.0±0.3 years<br>Sex: 64% girls                                                                                                                                                   | Poor                           | 3. Was the sample size included in the analysis adequate?                                                         |
| 3-Day Physical Activity Recall (3DPAR) recall questionnaire (modified) [92]                      | n = 20<br>Age: 13.3±0.9<br>Sex: 100% girls                                                                                                                                                        | Poor                           | 3. Was the sample size included in the analysis adequate?                                                         |
| SQUASH [93]                                                                                      | n = 17<br>Age: 17.5±0.6 years<br>Sex: 53% girls                                                                                                                                                   | Poor                           | 3. Was the sample size included in the analysis adequate?                                                         |
| International Physical Activity Questionnaire for Adolescents (adapted version of the IPAQ) [94] | n = 2018<br>Age: [12.5-17.5 years]<br>Sex: 54% girls                                                                                                                                              | Poor (all comparison measures) | 8. For convergent validity: Were the measurement properties of the comparator instrument(s) adequately described? |
| Recess Physical Activity Recall (RPAR) [95]                                                      | n = 49 (pedometer)<br>Age: 13.3±0.5 years<br>Sex: 65% girls<br><br>n = 32 (biotrainer)<br>Age: 12.9±0.8 years<br>Sex: 31% girls<br><br>n = 32 (actigraph)<br>Age 12.7±0.8 years<br>Sex: 38% girls | Poor (all comparison measures) | 4. Were hypotheses regarding correlations or mean differences formulated a priori (i.e. before data collection)?  |
| Swedish Adolescent Physical Activity Questionnaire (SAPAQ) [96] <sup>d</sup>                     | n = 50<br>Age: 16.9±0.4 years<br>Sex: 62% girls                                                                                                                                                   | Poor                           | 4. Were hypotheses regarding correlations or mean differences formulated a priori (i.e. before data collection)?  |

|                                                                                          |                                                                                                        |      |                                                                                                                                                                                                                                         |
|------------------------------------------------------------------------------------------|--------------------------------------------------------------------------------------------------------|------|-----------------------------------------------------------------------------------------------------------------------------------------------------------------------------------------------------------------------------------------|
| Activity Questionnaire for Adults and Adolescents (AQuAA) [22]                           | n = 236<br>Age: 15.0±1.0 years<br>Sex: 60% girls                                                       | Poor | 4.Were hypotheses regarding correlations or mean differences formulated a priori (i.e. before data collection)?                                                                                                                         |
| Computer assisted interview based on NHANES survey [97]                                  | n = 2761<br>Age: 12- to 19- year olds<br>Sex: 48% girls                                                | Poor | 4.Were hypotheses regarding correlations or mean differences formulated a priori (i.e. before data collection)?                                                                                                                         |
| Previous Day Physical Activity Recall (PDPAR-24) self-report instrument [32]             | n = 122<br>Age: 13.8 ±1.2 years<br>Sex: 53% girls                                                      | Poor | 4.Were hypotheses regarding correlations or mean differences formulated a priori (i.e. before data collection)?                                                                                                                         |
| Dutch Physical Activity Checklist for Adolescents (PAQ-A) [35]                           | n = 44<br>Age: 14.2±1.8 years<br>Sex: 41% girls                                                        | Poor | 8.For convergent validity: Were the measurement properties of the comparator instrument(s) adequately described?                                                                                                                        |
| Godin-Shephard Survey [98]                                                               | n =102<br>Age: 11.2±0.7 years (n=36), 13.6±0.5 years (n=36) olds, 16.4±0.8 years (n=30) Sex: 51% girls | Poor | 10.Were design and statistical methods adequate for the hypotheses to be tested?                                                                                                                                                        |
| Children's Leisure Activities Study Survey (CLASS) questionnaire (Modified version) [99] | n = 108<br>Age 12 years<br>Sex: 58.3% girls                                                            | Poor | 4.Were hypotheses regarding correlations or mean differences formulated a priori (i.e. before data collection)?<br><br>8.For convergent validity: Were the measurement properties of the comparator instrument(s) adequately described? |

<sup>a</sup> Age presented as mean age ± SD [range]

<sup>b</sup> Based on the COSMIN checklist

<sup>c</sup> Based on the 'lowest score counts' method: the design requirement that was scored lowest is shown, if multiple design requirements received the lowest score all design requirements receiving this score are shown.

<sup>d</sup> Study from previous review

Table 2 – Test-retest reliability methodological quality scores

| Questionnaire                                                                                                                        | Study population <sup>a</sup>                                     | Methodological quality <sup>b</sup> | Design requirement(s) that determined the final methodological quality score <sup>c</sup>                                  |
|--------------------------------------------------------------------------------------------------------------------------------------|-------------------------------------------------------------------|-------------------------------------|----------------------------------------------------------------------------------------------------------------------------|
| Preschool-age Children's Physical Activity Questionnaire (Pre-PAQ) [58]                                                              | n = 103<br>Age: 3.8±0.74 years<br>Sex: 48% girls                  | Good                                | 5. Were the administrations independent?<br>7. Were patients stable in the interim period on the construct to be measured? |
| Energy Balance Related Behaviors (ERBs) self-administered primary caregivers questionnaire (PCQ), from the ToyBox-study (proxy) [46] | n = 93 preschoolers                                               | Fair                                | 2. Was there a description of how missing items were handled?                                                              |
| Children's Leisure Activities Study Survey (CLASS) (proxy) [100] <sup>d</sup>                                                        | n = 58<br>Age: 5.3±0.5 years<br>[5-6]<br>Sex: 37% girls           | Fair                                | 2. Was there a description of how missing items were handled?                                                              |
| Physical activity questionnaire for parents of preschoolers in Mexico [40]                                                           | n = 21<br>Age: 3- to 5-year olds<br>Sex: percentage girls unknown | Poor                                | 3. Was the sample size included in the analysis adequate?                                                                  |
| Kid Active Q (webbased)(proxy) [101]                                                                                                 | n = 20<br>Age: 4.2±1.3 years<br>[2-6]<br>Sex: 50% girls           | Poor                                | 3. Was the sample size included in the analysis adequate?                                                                  |
| Chinese version of the Physical Activity                                                                                             | n = 92                                                            | Good                                | 3. Was the sample size included in the analysis adequate?                                                                  |



|                                                                                         |                                                                        |      |                                                                                                                                                                                                                                                                                                                  |
|-----------------------------------------------------------------------------------------|------------------------------------------------------------------------|------|------------------------------------------------------------------------------------------------------------------------------------------------------------------------------------------------------------------------------------------------------------------------------------------------------------------|
| Questionnaire for Older Children (PAQ-C) [43]                                           | Age: 8- to 13-year olds<br>Sex: 45% girls                              |      |                                                                                                                                                                                                                                                                                                                  |
| ATN-questionnaire [41]                                                                  | n = 87<br>Age: 11- to 12-year olds<br>Sex: percentage girls unknown    | Good | 3. Was the sample size included in the analysis adequate?                                                                                                                                                                                                                                                        |
| Children's Leisure Activities Study Survey Chinese-version questionnaire (CLASS-C) [50] | n = 214<br>Age: 10.9±0.9 years [9-12]<br>Sex: 62% girls                | Good | 5. Were the administrations independent?                                                                                                                                                                                                                                                                         |
| Out-of-school Physical Activity questionnaire [62]                                      | n = 151<br>Age: 11-year-olds<br>Sex: 60% girls (in total sample n=155) | Good | 2. Was there a description of how missing items were handled?<br>5. Were the administrations independent?<br>7. Were patients stable in the interim period on the construct to be measured?<br>9. Were the test conditions similar for both measurements? E.g. type of administration, environment, instructions |
| the ENERGY-child questionnaire [48]                                                     | n = 730<br>Age: [11.3±0.5 - 12.5±0.6 years]<br>Sex: [47% - 58% girls]  | Fair | 2. Was there a description of how missing items were handled?                                                                                                                                                                                                                                                    |
| Self-Administered Physical Activity Checklist                                           | n = 72<br>Age: 11.5±0.5 years<br>Sex: 49% girls                        | Fair | 8. Was the time interval appropriate?                                                                                                                                                                                                                                                                            |

|                                                                                                                                                      |                                                                                                                                                                            |                    |                                                                                                                                                                    |
|------------------------------------------------------------------------------------------------------------------------------------------------------|----------------------------------------------------------------------------------------------------------------------------------------------------------------------------|--------------------|--------------------------------------------------------------------------------------------------------------------------------------------------------------------|
| (SAPAC) (Greek version)<br>[49]                                                                                                                      |                                                                                                                                                                            |                    |                                                                                                                                                                    |
| Physical Activity<br>Questionnaire for Older<br>Children (PAQ-C) [29] <sup>d</sup>                                                                   | n = 84<br>Age: 9- to 14-year<br>olds<br>Sex: 49% girls                                                                                                                     | Fair               | 2.Was there a description of how missing<br>items were handled?                                                                                                    |
| Girls health Enrichment<br>Multisite Study Activity<br>Questionnaire (GAQ)<br>[102] <sup>d</sup>                                                     | n = 68<br>Age: 9.0±0.6 years<br>Sex: 100% girls                                                                                                                            | Fair               | 10.Were there any important flaws in the<br>design or methods of the study?                                                                                        |
| Food, Health, and Choices<br>questionnaire (FHC-Q)<br>[37]                                                                                           | n = 82 (digital vs.<br>paper)<br>Age: <9- to >12-year<br>olds<br>Sex: 51 % girls<br><br>n = 73 (digital vs.<br>digital)<br>Age: <9- to >12-year<br>olds<br>Sex: 45 % girls | Fair (both groups) | 2.Was there a description of how missing<br>items were handled?                                                                                                    |
| The South American<br>Youth/Child<br>Cardiovascular and<br>Environment Study<br>(SAYCARE) Physical<br>Activity (PA)<br>questionnaire (proxy)<br>[66] | n = 161<br>Age: 3- to 10-year<br>olds<br>Sex: 50 % girls                                                                                                                   | Fair               | 2.Was there a description of how missing<br>items were handled?<br><br>11.For continuous scores: Was an<br>intraclass correlation coefficient (ICC)<br>calculated? |
| Dutch Physical Activity<br>Checklist for Children<br>(PAQ-C) [35]                                                                                    | n = 192<br>Age: 8.9±1.7 years<br>[5-12]<br>Sex: 53% girls                                                                                                                  | Fair               | 5.Were the administrations<br>independent?<br><br>9.Were the test conditions similar for<br>both measurements? E.g. type of                                        |

|                                                                                       |                                                                                                   |                                                                  |                                                                                                                                                   |
|---------------------------------------------------------------------------------------|---------------------------------------------------------------------------------------------------|------------------------------------------------------------------|---------------------------------------------------------------------------------------------------------------------------------------------------|
|                                                                                       |                                                                                                   |                                                                  | administration, environment, instructions                                                                                                         |
| Instrument to assess children's outdoor active play in various locations (proxy) [77] | n = 53<br>Age: 9.5±0.7 years [8.3-12.3]<br>Sex: 42% girls                                         | Fair                                                             | 2.Was there a description of how missing items were handled?                                                                                      |
| Parent proxy-report of physical activity and sedentary activities (proxy) [73]        | n = 147<br>Age: 6- to 10-year olds, 13- to 14-year olds<br>Sex: 51% girls (in total sample n=189) | 2 months time interval: Fair<br><br>6 months time interval: Poor | Fair: 8.Was the time interval appropriate?<br><br>Poor: 8.Was the time interval appropriate?                                                      |
| Physical Activity Questionnaire for older Children (PAQ-C) (Spanish version) [52]     | n = 83<br>Age: 11.0 ± 1.2<br>Sex: 45 % girls                                                      | Poor                                                             | 8.Was the time interval appropriate?                                                                                                              |
| Godin Leisure-Time Exercise Questionnaire [63]                                        | n = 31<br>Age: 10.6 ± 0.2<br>Sex: 45 % girls                                                      | Poor                                                             | 8.Was the time interval appropriate?                                                                                                              |
| The Modified Godin Leisure-Time Exercise Questionnaire [45]                           | n = 139<br>Age: 11.1 ± 0.4<br>Sex: 52 % girls                                                     | Poor                                                             | 8.Was the time interval appropriate?                                                                                                              |
| Single-item activity measure [23]                                                     | n = 107<br>Age: 14.7±0.5<br>Sex: 38% girls (age and sex total sample n=123)                       | Good                                                             | 2.Was there a description of how missing items were handled?<br><br>7.Were patients stable in the interim period on the construct to be measured? |
| Web-based and paper-based Physical Activity                                           | n = 323<br>Age 12.8 years                                                                         | Good                                                             | 2.Was there a description of how missing items were handled?                                                                                      |

|                                                                                                    |                                                         |      |                                                                                                                                                                                                                                                                                                                                                                    |
|----------------------------------------------------------------------------------------------------|---------------------------------------------------------|------|--------------------------------------------------------------------------------------------------------------------------------------------------------------------------------------------------------------------------------------------------------------------------------------------------------------------------------------------------------------------|
| Questionnaire for Older Children (PAQ-C) [28]                                                      | Sex: 51% girls<br>(age and sex total sample n=459)      |      | 5.Were the administrations independent?<br><br>11.For continuous scores: Was an intraclass correlation coefficient (ICC) calculated?                                                                                                                                                                                                                               |
| An adapted version of the Assessment of Physical Activity Levels Questionnaire (APALQ) [53]        | n = 150<br>Age: 13.6 ± 1.1<br>Sex: 52 % girls           | Good | 5.Were the administrations independent?<br><br>7.Were patients stable in the interim period on the construct to be measured?<br><br>9.Were the test conditions similar for both measurements? E.g. type of administration, environment, instructions                                                                                                               |
| International Physical Activity Questionnaire - Short Form (IPAQ - SF) [84]                        | n = 92<br>Age: 15.9±1.4 years [12-18]<br>Sex: 53% girls | Good | 3.Was the sample size included in the analysis adequate?<br><br>7.Were patients stable in the interim period on the construct to be measured?<br><br>9.Were the test conditions similar for both measurements? E.g. type of administration, environment, instructions<br><br>11.For continuous scores: Was an intraclass correlation coefficient (ICC) calculated? |
| Child and Adolescent Physical Activity and Nutrition survey (CAPANS-PA) recall questionnaire [103] | n = 77<br>Age: 12±0.8 years [11-14]<br>Sex: 51% girls   | Good | 3.Was the sample size included in the analysis adequate?<br><br>7.Were patients stable in the interim period on the construct to be measured?                                                                                                                                                                                                                      |
| Activity Questionnaire for Adults and Adolescents (AQuAA) [21]                                     | n = 53<br>Age: 14.1±1.4 years<br>Sex: 43% girls         | Good | 2.Was there a description of how missing items were handled?<br><br>3.Was the sample size included in the analysis adequate? 7.Were patients                                                                                                                                                                                                                       |

|                                                                                                |                                                                                                        |      |                                                                                                                                                            |
|------------------------------------------------------------------------------------------------|--------------------------------------------------------------------------------------------------------|------|------------------------------------------------------------------------------------------------------------------------------------------------------------|
|                                                                                                |                                                                                                        |      | stable in the interim period on the construct to be measured?<br><br>11.For continuous scores: Was an intraclass correlation coefficient (ICC) calculated? |
| Godin-Shephard Survey [98]                                                                     | n =102<br>Age: 11.2±0.7 years (n=36), 13.6±0.5 years (n=36) olds, 16.4±0.8 years (n=30) Sex: 51% girls | Fair | 11.For continuous scores: Was an intraclass correlation coefficient (ICC) calculated?                                                                      |
| VISA-TEEN questionnaire [104]                                                                  | n = 228<br>Age 15.4±1.6 years<br>Sex: 46% girls<br>(age and sex total sample n=396)                    | Fair | 8.Was the time interval appropriate?                                                                                                                       |
| Children's Leisure Activities Study Survey (CLASS) questionnaire (Modified version) [99]       | n = 108<br>Age 12 years<br>Sex: 58.3% girls                                                            | Fair | 2.Was there a description of how missing items were handled?                                                                                               |
| Oxford Physical Activity Questionnaire (OPAQ) [23]                                             | n = 104<br>Age: 14.7±0.5<br>Sex: 38% girls (age and sex total sample n=123)                            | Fair | 2.Was there a description of how missing items were handled?                                                                                               |
| Quantification de l'activité physique en altitude chez les enfants (QAPACE) [105] <sup>d</sup> | n = 121<br>Age: 8- to 16-year olds<br>Sex: 54% girls                                                   | Fair | 7.Were patients stable in the interim period on the construct to be measured?                                                                              |

|                                                                                                                                                                                             |                                                                                                          |      |                                                                                                      |
|---------------------------------------------------------------------------------------------------------------------------------------------------------------------------------------------|----------------------------------------------------------------------------------------------------------|------|------------------------------------------------------------------------------------------------------|
| Oxford Physical Activity Questionnaire (OPAQ) [24] <sup>d</sup>                                                                                                                             | n = 87<br>Age: 13.1±0.9 years<br>Sex: 45% girls                                                          | Fair | 2.Was there a description of how missing items were handled?                                         |
| World Health Organization Health Behavior in Schoolchildren questionnaire (WHO HBSC) [106] <sup>d</sup>                                                                                     | n = 71<br>Age: 14.9±1.6 [13-18]<br>Sex: 56% girls                                                        | Fair | 2.Was there a description of how missing items were handled?                                         |
| Selected indicators from the Health Behaviour in School-aged Children (HBSC) questionnaire (Chinese version) [107]                                                                          | n = 95 (n=44 11-year-olds, n=51 15-year-olds)<br>Age: [11.7 ± 0.4 to 15.8 ± 0.3 years]<br>Sex: 46% girls | Fair | 2.Was there a description of how missing items were handled?                                         |
| Selected physical activity items of the international Health Behavior in School-aged Children (HBSC) questionnaire (Czech version) [108]                                                    | n = 693<br>Age: 11.1±0.5 years and 15.1±0.5yrs<br>Sex: 49.1% girls                                       | Fair | 2.Was there a description of how missing items were handled?                                         |
| Measures of in-school and out-of-school physical activity, and travel behaviors of the international Healthy Environments and active living in teenagers – Hong Kong (iHealt(H)) study [47] | n = 68<br>Age: 15.4 years<br>Sex: 47% girls                                                              | Fair | 2.Was there a description of how missing items were handled?                                         |
| Physical Activity and Lifestyle Questionnaire                                                                                                                                               | n = 21<br>Age: 13.7±0.8 years                                                                            | Fair | 3.Was the sample size included in the analysis adequate?<br><br>8.Was the time interval appropriate? |

|                                                                                                                                           |                                                                                                         |      |                                                                                                                                                                                                        |
|-------------------------------------------------------------------------------------------------------------------------------------------|---------------------------------------------------------------------------------------------------------|------|--------------------------------------------------------------------------------------------------------------------------------------------------------------------------------------------------------|
| (PALQ) (Greek version)<br>[33]                                                                                                            | Sex: 43% girls (age<br>and sex total sample<br>n=40)                                                    |      |                                                                                                                                                                                                        |
| The South American<br>Youth/Child<br>Cardiovascular and<br>Environment Study<br>(SAYCARE) Physical<br>Activity (PA)<br>questionnaire [66] | n = 177<br>Age: 11- to 18-year<br>olds<br>Sex: 58 % girls                                               | Fair | 2.Was there a description of how missing<br>items were handled?<br>8.Was the time interval appropriate?<br>11.For continuous scores: Was an<br>intraclass correlation coefficient (ICC)<br>calculated? |
| Self-administered<br>questionnaire on<br>children's travel to school<br>[39]                                                              | n = 61 (study 1), 68<br>(study 2)<br>Age: 11- to 14-year<br>olds<br>Sex: percentage of<br>girls unknown | Fair | 2.Was there a description of how missing<br>items were handled?                                                                                                                                        |
| Dutch Physical Activity<br>Checklist for Adolescents<br>(PAQ-A)<br>[35]                                                                   | n = 94<br>Age: 13.6±1.4 years<br>[12-17]<br>Sex: 55% girls                                              | Fair | 5.Were the administrations<br>independent?<br>9.Were the test conditions similar for<br>both measurements? E.g. type of<br>administration, environment,<br>instructions                                |
| 3-Day Physical Activity<br>Recall (3DPARecall)<br>instrument (Singaporean<br>version) [42]                                                | n = 106<br>Age: 14.5±1.1 years<br>[13-16]<br>Sex: 53% girls (age<br>and sex total sample<br>n=221)      | Poor | 8.Was the time interval appropriate?                                                                                                                                                                   |
| 3-Day Physical Activity<br>Record (3DPARecord)<br>(Greek version) [33]                                                                    | n = 21<br>Age: 13.7±0.8 years<br>Sex: 43% girls (age<br>and sex total sample<br>n=40)                   | Poor | 8.Was the time interval appropriate?                                                                                                                                                                   |

|                                                                                             |                                                                             |      |                                      |
|---------------------------------------------------------------------------------------------|-----------------------------------------------------------------------------|------|--------------------------------------|
| Recess Physical Activity Recall (RPAR) [95]                                                 | n = 113<br>Age 13.1±0.7 years<br>Sex: 48% girls                             | Poor | 8.Was the time interval appropriate? |
| Refined 60-min MVPA screening measure [109] <sup>d</sup>                                    | n = 138<br>Age: 12.1±0.9<br>Sex: 65% girls                                  | Poor | 8.Was the time interval appropriate? |
| MVPA scores of the Health Behavior in School-aged Children (HBSC) Research Protocol [90]    | n = 998<br>Age: 12.7 ± 1.4<br>Sex: 50 % girls                               | Poor | 8.Was the time interval appropriate? |
| MVPA scores of the International Physical Activity Questionnaire Short form (IPAQ-SF) [90]  | n = 998<br>Age: 12.7 ± 1.4<br>Sex: 50 % girls                               | Poor | 8.Was the time interval appropriate? |
| Moderate and vigorous physical activity items of the Youth Risk Behavior Survey (YRBS) [83] | n = 128<br>Age: 12.2±0.6 years<br>(in total sample n=139)<br>Sex: 53% girls | Poor | 8.Was the time interval appropriate? |

<sup>a</sup> Age presented as mean age ± SD [range]

<sup>b</sup> Based on the COSMIN checklist

<sup>c</sup> Based on the 'lowest score counts' method: the design requirement that was scored lowest is shown, if multiple design requirements received the lowest score all design requirements receiving this score are shown.

<sup>d</sup> Study from previous review

Table 3. Measurement error methodological quality scores

| Questionnaire                              | Study population <sup>a</sup> | Methodological quality <sup>b</sup> | Design requirement(s) that determined the final methodological quality score <sup>c</sup> |
|--------------------------------------------|-------------------------------|-------------------------------------|-------------------------------------------------------------------------------------------|
| Preschool-age Children's Physical Activity | n = 103                       | Good                                | 5.Were the administrations independent?                                                   |



|                                                                       |                                                                                  |      |                                                                                                                                                               |
|-----------------------------------------------------------------------|----------------------------------------------------------------------------------|------|---------------------------------------------------------------------------------------------------------------------------------------------------------------|
| Questionnaire (Pre-PAQ) [58]                                          | Age: 3.8±0.74 years<br>Sex: 48% girls                                            |      | 7. Were patients stable in the interim period on the construct to be measured?                                                                                |
| the ENERGY-child questionnaire [48]                                   | n = 730<br>Age: [11.3±0.5 - 12.5±0.6 years]<br>Sex: [47% - 58% girls]            | Fair | 2. Was there a description of how missing items were handled?                                                                                                 |
| Dutch Physical Activity Checklist for Children (PAQ-C) [35]           | n = 192<br>Age: 8.9±1.7 years [5-12]<br>Sex: 53% girls                           | Fair | 5. Were the administrations independent?<br>9. Were the test conditions similar for both measurements? E.g. type of administration, environment, instructions |
| Children's Leisure Activities Study Survey (CLASS) [100] <sup>d</sup> | n = 109<br>Age: 10.6±0.8 years [10-12] (in total sample n=111)<br>Sex: 63% girls | Fair | 2. Was there a description of how missing items were handled?                                                                                                 |
| ATN-questionnaire (days/week type of transportation) [41]             | n = 87<br>Age: 11- to 12-year olds<br>Sex: percentage girls unknown              | Good | 3. Was the sample size included in the analysis adequate?                                                                                                     |
| 3-Day Physical Activity Recall (3DPARecall) [19] <sup>d</sup>         | n = 65<br>Age: 12.5 ±1.1 years                                                   | Good | 3. Was the sample size included in the analysis adequate?                                                                                                     |

|                                                                                                                                                                                             |                                                                                      |      |                                                                                                                                                               |
|---------------------------------------------------------------------------------------------------------------------------------------------------------------------------------------------|--------------------------------------------------------------------------------------|------|---------------------------------------------------------------------------------------------------------------------------------------------------------------|
|                                                                                                                                                                                             | Sex: 64% girls (age and sex in total sample n=320)                                   |      |                                                                                                                                                               |
| Self-Administered Physical Activity Checklist (SAPAC) (modified) [19] <sup>d</sup>                                                                                                          | n = 84<br>Age: 12.5 ±1.1 years<br>Sex: 64% girls (age and sex in total sample n=320) | Good | 3. Was the sample size included in the analysis adequate?                                                                                                     |
| Measures of in-school and out-of-school physical activity, and travel behaviors of the international Healthy Environments and active living in teenagers – Hong Kong (iHealt(H)) study [47] | n = 68;<br>Age: 15.4 years<br>Sex: 47% girls                                         | Fair | 2. Was there a description of how missing items were handled?                                                                                                 |
| Dutch Physical Activity Checklist for Adolescents (PAQ-A) [35]                                                                                                                              | n = 94<br>Age: 13.6±1.4 years [12-17]<br>Sex: 55% girls                              | Fair | 5. Were the administrations independent?<br>9. Were the test conditions similar for both measurements? E.g. type of administration, environment, instructions |

ME: Measurement error; PoA: Percentage of Agreement; PA: physical activity; PE: Physical education; MPA: Moderate Physical Activity; VPA: Vigorous Physical Activity

<sup>a</sup> Age presented as mean age ± SD [range]

<sup>b</sup> Based on the COSMIN checklist

<sup>c</sup> Based on the 'lowest score counts' method: the design requirement that was scored lowest is shown, if multiple design requirements received the lowest score all design requirements receiving this score are shown.

<sup>d</sup> Study from previous review
